# Supplementary material for: Enhanced quinoline removal by zero-valent iron-coupled novel anaerobic processes: performance and underlying function analysis
Source: Royal Society of Chemistry journal article supplement (doi:10.1039/c8ra09529a), 2019-01-01
Supplement: c8ra09529a1.pdf [file c8ra09529a1.pdf]

1 **Supporting information for**

2 **Enhanced quinoline removal by zero-valent iron coupled novel**

3 **anaerobic processes: performance and underlying function analysis**

4 Sufang Wang, Aijuan Zhou, Jianguang Zhang, Zhaohua Liu, Jierong Zheng, Xiaochan

5 Zhao, Xiuping Yue\*

6 **\*Corresponding author.** E-mail: [yuexiuping@tyut.edu.cn](mailto:yuexiuping@tyut.edu.cn) (X. Yue)

7 **Contents**

8 Supporting tables (Table S1, S2)

## 9 Supporting tables

10 Table S1 Alpha diversity parameters

| Name    | Seq<br>num* <sup>1</sup> | OTU<br>num* <sup>1</sup> | Shannon<br>-index | Simpson | ACE<br>index | Chao1<br>index |
|---------|--------------------------|--------------------------|-------------------|---------|--------------|----------------|
| Control | 56853                    | 2134                     | 4.08              | 0.059   | 15966.97     | 9584.53        |
| IP      | 89490                    | 3823                     | 5.20              | 0.022   | 9891.16      | 9333.85        |
| IS      | 40777                    | 1591                     | 3.86              | 0.074   | 8319.70      | 5061.21        |
| RIS     | 49240                    | 1622                     | 3.24              | 0.145   | 13072.79     | 6913.01        |

11 \*<sup>1</sup>: “Seq num” indicated the sequence numbers obtained from the high-throughput

12 sequencing analysis;

13 \*<sup>2</sup>: “OTU num” indicated the classified OTU numbers obtained from the gene

14 sequences with the identity of over 97%.

Table S2 Genera (relative abundance &gt;1% in at least one samples)

| Genera                                             | Control | IP   | IS    | RIS   |
|----------------------------------------------------|---------|------|-------|-------|
| <i>Azotobacter</i>                                 | 16.33   | 8.88 | 21.81 | 4.72  |
| <i>Thermomonas</i>                                 | 0.47    | 0.07 | 0.53  | 36.2  |
| <i>Alicyclophilus</i>                              | 12.56   | 1.79 | 7.83  | 3.01  |
| <i>Pseudomonas</i>                                 | 3.77    | 2.26 | 4.76  | 12.41 |
| <i>Rhizobium</i>                                   | 10.25   | 2.36 | 6.45  | 0.78  |
| <i>Novosphingobium</i>                             | 3.32    | 4.76 | 7.91  | 0.44  |
| <i>Rhizorhabdus</i>                                | 4.78    | 3.35 | 3.45  | 0.64  |
| <i>Comamonas</i>                                   | 3.6     | 2.85 | 4.17  | 1.75  |
| <i>Ignavibacterium</i>                             | 5.75    | 0.57 | 5.18  | 2.11  |
| <i>Acinetobacter</i>                               | 0.28    | 6.9  | 0.27  | 0.5   |
| <i>Eubacterium</i>                                 | 1.98    | 4.24 | 1.17  | 0.02  |
| <i>Exiguobacterium</i>                             | 0.76    | 4.39 | 0.82  | 1.15  |
| <i>Sphingopyxis</i>                                | 0.55    | 0.58 | 0.4   | 6.24  |
| <i>Citrobacter</i>                                 | 0.5     | 3.3  | 0.53  | 0.85  |
| <i>Bacillus</i>                                    | 0.09    | 0.14 | 0.04  | 7.13  |
| <i>Stenotrophomonas</i>                            | 0.92    | 0.16 | 0.69  | 5.23  |
| <i>Chelatococcus</i>                               | 1.19    | 2.14 | 1.2   | 0.15  |
| <i>Thauera</i>                                     | 1.28    | 0.68 | 4.07  | 0.13  |
| <i>Planctomicrobium</i>                            | 0.1     | 2.96 | 0.06  | 0.03  |
| <i>Ornatilinea</i>                                 | 0.86    | 1.53 | 0.67  | 0.18  |
| <i>Brevibacillus</i>                               | 0.52    | 1.09 | 1.48  | 0.14  |
| <i>Limnobacter</i>                                 | 1.01    | 0.71 | 0.88  | 0.1   |
| <i>Clostridium sensu stricto</i>                   | 0.04    | 1.28 | 0.03  | 0.73  |
| <i>Methyloversatilis</i>                           | 1.12    | 0.52 | 0.76  | 0.11  |
| <i>Hydrotalea</i>                                  | 0       | 0    | 0     | 2.67  |
| <i>Saccharibacteria_genera_in<br/>certae_sedis</i> | 0.08    | 1.34 | 0.08  | 0.04  |
| <i>Acetoanaerobium</i>                             | 0.01    | 1.19 | 0.01  | 0     |
| <i>Lactobacillus</i>                               | 0.02    | 1.02 | 0.03  | 0.02  |
